# Supplementary material
Source: PubMed Central journal article supplement (PMC6439877)
Supplement: jamaneurol-76-41-s001.pdf [file jamaneurol-76-41-s001.pdf]

## Supplementary Online Content

Mantri S, Fullard M, Gray SL, et al. Patterns of dementia treatment and frank prescribing errors in older adults with Parkinson disease. *JAMA Neurol*. Published online October 1, 2018. doi:10.1001/jamaneurol.2018.2820

**eTable 1.** Anticholinergic Burden Score

**eTable 2.** Demographic Characteristics Associated with Specific Dementia Drug Use Among Medicare Beneficiaries with Parkinson Disease, 2014

This supplementary material has been provided by the authors to give readers additional information about their work.

| <b>eTable 1. Anticholinergic Burden Score</b> |                               |                               |
|-----------------------------------------------|-------------------------------|-------------------------------|
| <b>Drugs with ACB Score 1</b>                 | <b>Drugs with ACB Score 2</b> | <b>Drugs with ACB Score 3</b> |
| Alimemazine                                   | Amantadine                    | Amitriptyline                 |
| Alverine                                      | Belladonna                    | Amoxapine                     |
| Alprazolam                                    | Carbamazepine                 | Atropine                      |
| Aripiprazole                                  | Cyclobenzaprine               | Benztropine                   |
| Asenapine                                     | Cyproheptadine                | Brompheniramine               |
| Atenolol                                      | Loxapine                      | Carbinoxamine                 |
| Bupropion                                     | Meperidine                    | Chlorpheniramine              |
| Captopril                                     | Methotrimeprazine             | Chlorpromazine                |
| Cetirizine                                    | Molindone                     | Clemastine                    |
| Chlorthalidone                                | Nefopam                       | Clomipramine                  |
| Cimetidine                                    | Oxcarbazepine                 | Clozapine                     |
| Clidinium                                     | Pimozide                      | Darifenacin                   |
| Clorazepate                                   |                               | Desipramine                   |
| Codeine                                       |                               | Dicyclomine                   |
| Colchicine                                    |                               | Dimenhydrinate                |
| Desloratadine                                 |                               | Diphenhydramine               |
| Diazepam                                      |                               | Doxepin                       |
| Digoxin                                       |                               | Doxylamine                    |
| Dipyridamole                                  |                               | Fesoterodine                  |
| Disopyramide                                  |                               | Flavoxate                     |
| Fentanyl                                      |                               | Hydroxyzine                   |
| Furosemide                                    |                               | Hyoscyamine                   |
| Flovoxamine                                   |                               | Imipramine                    |
| Haloperidol                                   |                               | Meclizine                     |
| Hydralazine                                   |                               | Methocarbamol                 |

|                                                                                                                                                                                                         |  |                 |
|---------------------------------------------------------------------------------------------------------------------------------------------------------------------------------------------------------|--|-----------------|
| Hydrocortisone                                                                                                                                                                                          |  | Nortriptyline   |
| lloperidone                                                                                                                                                                                             |  | Olanzapine      |
| Isosorbide                                                                                                                                                                                              |  | Orphenadrine    |
| Levocetirizine                                                                                                                                                                                          |  | Oxybutynin      |
| Loperamide                                                                                                                                                                                              |  | Paroxetine      |
| Loratidine                                                                                                                                                                                              |  | Perphenazine    |
| Metoprolol                                                                                                                                                                                              |  | Procyclidine    |
| Morphine                                                                                                                                                                                                |  | Promethazine    |
| Nifedipine                                                                                                                                                                                              |  | Propantheline   |
| Paliperidone                                                                                                                                                                                            |  | Propiverine     |
| Prednisone                                                                                                                                                                                              |  | Quetiapine      |
| Quinidine                                                                                                                                                                                               |  | Scopolamine     |
| Ranitidine                                                                                                                                                                                              |  | Solifenacin     |
| Risperidone                                                                                                                                                                                             |  | Thioridazine    |
| Theophylline                                                                                                                                                                                            |  | Tolterodine     |
| Trazodone                                                                                                                                                                                               |  | Trifluoperazine |
| Triamterene                                                                                                                                                                                             |  | Trihexyphenidyl |
| Venlafaxine                                                                                                                                                                                             |  | Trimipramine    |
| Warfarin                                                                                                                                                                                                |  | Trospium        |
| Campbell, N.L., Maidment, I., Fox, C., Khan, B. and Boustani, M. (2013). The 2012 update to the anticholinergic cognitive burden scale. Journal of the American Geriatrics Society, 61 (S1), S142-S143. |  |                 |

**eTable 2.** Demographic Characteristics Associated with Specific Dementia Drug Use\* Among Medicare Beneficiaries with Parkinson Disease, 2014

| Characteristic     |                       | Donepezil                         | Rivastigmine                      | Galantamine                       | Memantine                         | Donepezil + memantine             | Rivastigmine + memantine          |
|--------------------|-----------------------|-----------------------------------|-----------------------------------|-----------------------------------|-----------------------------------|-----------------------------------|-----------------------------------|
|                    |                       | AOR (95%CI)                       |
| Race/<br>Ethnicity | White                 | 1.00                              | 1.00                              | 1.00                              | 1.00                              | 1.00                              | 1.00                              |
|                    | black                 | <b>1.27</b><br><b>(1.19-1.35)</b> | <b>0.80</b><br><b>(0.75-0.86)</b> | <b>0.67</b><br><b>(0.55-0.83)</b> | <b>1.06</b><br><b>(1.0-1.12)</b>  | <b>1.22</b><br><b>(1.13-1.31)</b> | <b>0.87</b><br><b>(0.77-0.97)</b> |
|                    | other/unknown         | <b>0.87</b><br><b>(0.78-0.97)</b> | 0.99<br>(0.88-1.13)               | 0.83<br>(0.59-1.18)               | <b>1.12</b><br><b>(1.03-1.29)</b> | 0.92<br>(0.80-1.07)               | 1.00<br>(0.82-1.24)               |
|                    | Asian                 | 1.01<br>(0.93-1.12)               | 0.98<br>(0.89-1.09)               | <b>0.52</b><br><b>(0.37-0.74)</b> | 1.03<br>(0.94-1.12)               | 1.01<br>(0.90-1.13)               | <b>0.80</b><br><b>(0.67-0.95)</b> |
|                    | Hispanic              | <b>0.84</b><br><b>(0.77-0.91)</b> | 0.98<br>(0.89-1.09)               | <b>0.59</b><br><b>(0.44-0.80)</b> | <b>1.42</b><br><b>(1.31-1.53)</b> | <b>1.14</b><br><b>(1.03-1.26)</b> | <b>1.38</b><br><b>(1.22-1.57)</b> |
|                    | North American native | 1.04<br>(0.76-1.44)               | 0.89<br>(0.62-1.27)               | 0.61<br>(0.19-1.92)               | 0.84<br>(0.59-1.13)               | 0.79<br>(0.52-1.21)               | 0.93<br>(0.53-1.64)               |
| Sex                | male                  | 1.00                              | 1.00                              | 1.00                              | 1.00                              | 1.00                              | 1.00                              |
|                    | female                | 0.97<br>(0.95-1.01)               | 0.97<br>(0.94-1.00)               | <b>0.84</b><br><b>(0.77-0.92)</b> | <b>1.08</b><br><b>(1.05-1.11)</b> | <b>1.05</b><br><b>(1.01-1.09)</b> | 1.00<br>(0.51-1.06)               |
| Age                | 65-69 (ref)           | 1.00                              | 1.00                              | 1.00                              | 1.00                              | 1.00                              | 1.00                              |
|                    | 70-74                 | 1.0<br>(0.96-1.10)                | 1.02<br>(0.95-1.10)               | 1.17<br>(0.95-1.44)               | <b>1.13</b><br><b>(1.06-1.21)</b> | <b>1.19</b><br><b>(1.09-1.30)</b> | <b>1.14</b><br><b>(1.01-1.30)</b> |

|  |       |                         |                                        |                                        |                                        |                                        |                                        |
|--|-------|-------------------------|----------------------------------------|----------------------------------------|----------------------------------------|----------------------------------------|----------------------------------------|
|  | 75-79 | 0.97<br>(0.91-<br>1.03) | 1.05<br>(0.98-<br>1.12)                | <b>1.23</b><br><b>(1.01-<br/>1.50)</b> | <b>1.24</b><br><b>(1.16-<br/>1.32)</b> | <b>1.24</b><br><b>(1.14-<br/>1.35)</b> | <b>1.31</b><br><b>(1.17-<br/>1.48)</b> |
|  | 80-84 | 1.00<br>(0.93-<br>1.06) | 0.99<br>(0.93-<br>1.07)                | 1.14<br>(0.93-<br>1.38)                | <b>1.33</b><br><b>(1.25-<br/>1.42)</b> | <b>1.35</b><br><b>(1.24-<br/>1.46)</b> | <b>1.31(1.16</b><br><b>-1.47)</b>      |
|  | 85+   | 1.01<br>(0.95-<br>1.08) | <b>0.88</b><br><b>(0.83-<br/>0.95)</b> | <b>1.25</b><br><b>(1.03-<br/>1.52)</b> | <b>1.38</b><br><b>(1.30-<br/>1.47)</b> | <b>1.42</b><br><b>(1.31-<br/>1.54)</b> | <b>1.18</b><br><b>(1.05-<br/>1.32)</b> |

\* As measured by presence of a prescription fill from January 1, 2014-December 31, 2014. The categories are not mutually exclusive, a beneficiary could have more than one medication prescribed over the course of the year.

Statistically significant estimates are in bold.
